# Supplementary material for: Patterns of change in coral reef communities of a remote Maldivian atoll revisited after eleven years
Source: PeerJ. 2023 Oct 24;11:e16071. doi: 10.7717/peerj.16071 (PMC10710173; doi:10.7717/peerj.16071)
Supplement: Data S1 [file peerj-11-16071-s001.xlsx]

## Sheet: DATASET
			CA	AF	CAB	CAD	CAP	CAT	BC	EC	FC	Cfu	GC	MC	H	R	RK	S	SA	SP	SZ	TR	TU	V	W
Year	Reef Type	Code	Coralline Algae	Fleshy Algae	Coral Acropora branching	Coral Acropora digitate	Acropora palifera	Coral Acropora tabular	Coral branching	Coral encrusting	Coral foliose	Coral Fungidae	Coral globose	Coral massive	Heliopora	Coral rubble	Coral rock (incl. Dead coral)	Sand	Soft corals azooxanthellatae	Sponges	Soft corals zooxanthellatae + Palythoa	Others Clams	Others Tunicates	Others Fan & feather corals	Others Whip & wire corals
2009	Inner reef	L09	9	0	9	1	2	20	7	5	3	0	10	0	0	11	15	3	3	1	0	0	1	0	0
2009	Inner reef	L09	8	0	10	1	1	18	7	5	5	0	10	0	0	11	15	4	3	1	0	0	1	0	0
2009	Inner reef	L09	8	0	10	1	1	22	6	6	2	0	11	0	0	9	17	4	1	1	0	0	1	0	0
2009	Inner reef	L09	3	0	10	3	1	24	4	3	1	0	8	0	0	14	19	7	0	3	0	0	0	0	0
2009	Inner reef	L09	3	0	11	2	1	27	3	5	1	0	9	0	0	13	19	3	0	2	0	0	1	0	0
2009	Inner reef	L09	4	1	13	3	2	24	3	3	1	0	9	0	0	12	18	3	0	3	0	0	1	0	0
2009	Inner reef	L09	4	1	7	1	1	35	5	2	1	0	9	0	0	8	17	3	0	4	2	0	0	0	0
2009	Inner reef	L09	4	1	8	3	1	37	4	2	1	0	9	0	0	7	16	2	0	4	1	0	0	0	0
2009	Inner reef	L09	4	1	8	1	1	36	5	2	1	0	9	0	0	8	17	2	0	4	1	0	0	0	0
2009	Inner reef	L09	4	0	17	2	1	26	4	3	1	0	7	1	0	10	20	2	0	1	0	0	1	0	0
2009	Inner reef	L09	3	0	17	3	2	24	4	6	1	0	7	4	0	7	19	2	0	1	0	0	0	0	0
2009	Inner reef	L09	4	0	19	3	1	21	3	5	3	0	7	1	0	10	20	2	0	1	0	0	0	0	0
2009	Outer reef	O09	15	2	1	6	0	11	14	7	0	0	9	0	1	15	17	1	0	0	1	0	0	0	0
2009	Outer reef	O09	14	2	2	5	0	14	13	6	0	0	9	0	1	16	16	1	0	0	1	0	0	0	0
2009	Outer reef	O09	14	2	1	5	0	14	14	6	0	0	9	0	1	15	16	1	0	0	2	0	0	0	0
2009	Outer reef	O09	10	6	0	6	0	9	14	8	0	3	7	1	1	14	20	1	0	0	0	0	0	0	0
2009	Outer reef	O09	10	6	0	5	0	10	15	8	0	3	7	1	1	13	20	1	0	0	0	0	0	0	0
2009	Outer reef	O09	9	5	0	5	0	8	13	8	0	1	8	4	1	17	20	1	0	0	0	0	0	0	0
2009	Outer reef	O09	8	9	0	4	0	4	13	3	0	0	7	0	1	21	29	1	0	0	0	0	0	0	0
2009	Outer reef	O09	8	8	0	3	0	4	15	3	0	0	7	0	1	19	31	1	0	0	0	0	0	0	0
2009	Outer reef	O09	9	7	0	3	0	4	17	3	0	0	8	0	1	18	29	1	0	0	0	0	0	0	0
2009	Outer reef	O09	18	2	0	4	0	8	12	8	0	0	9	0	3	15	20	1	0	0	0	0	0	0	0
2009	Outer reef	O09	17	2	0	4	0	10	13	7	0	0	10	0	3	13	20	1	0	0	0	0	0	0	0
2009	Outer reef	O09	17	2	0	3	0	9	11	10	0	0	9	0	3	14	21	1	0	0	0	0	0	0	0
2009	Inner reef	I09	5	1	8	1	0	19	5	5	0	0	9	0	0	10	14	12	0	9	0	0	1	0	1
2009	Inner reef	I09	4	1	9	1	0	18	5	6	0	0	9	0	0	10	14	15	0	7	0	0	1	0	0
2009	Inner reef	I09	4	1	5	1	0	17	5	6	0	0	9	0	0	10	15	16	0	9	0	0	1	0	1
2009	Inner reef	I09	2	1	10	2	0	19	5	2	0	0	5	0	0	18	12	16	0	3	1	1	2	0	1
2009	Inner reef	I09	2	1	9	1	0	20	5	2	0	0	6	0	0	16	12	18	0	3	1	1	2	0	1
2009	Inner reef	I09	2	1	10	1	0	18	5	2	0	0	8	0	0	16	14	16	0	3	1	2	1	0	0
2009	Inner reef	I09	5	2	3	1	0	25	3	2	0	0	7	0	0	10	16	18	0	6	0	0	1	1	0
2009	Inner reef	I09	5	2	3	3	0	23	3	2	0	0	8	0	0	10	16	18	0	5	0	0	1	1	0
2009	Inner reef	I09	5	2	3	3	0	23	5	2	0	0	8	0	0	10	15	18	0	5	0	0	1	0	0
2009	Inner reef	I09	3	1	6	1	0	22	4	4	0	0	8	0	0	15	19	11	0	2	1	0	2	1	0
2009	Inner reef	I09	2	1	5	1	0	19	4	4	0	0	8	0	0	15	23	12	0	2	1	0	2	1	0
2009	Inner reef	I09	2	1	7	1	0	23	3	4	0	0	7	0	0	17	17	12	0	2	2	0	1	1	0
2009	Outer reef	O09	10	1	1	3	2	10	13	7	1	4	7	0	0	16	19	1	0	0	4	1	0	0	0
2009	Outer reef	O09	6	1	2	3	1	10	14	9	2	4	10	0	0	16	18	1	0	0	2	1	0	0	0
2009	Outer reef	O09	10	1	1	3	1	9	14	9	1	2	9	0	0	17	19	1	0	0	2	1	0	0	0
2009	Outer reef	O09	7	4	2	1	0	8	15	9	1	2	7	4	0	19	17	1	0	0	3	0	0	0	0
2009	Outer reef	O09	7	4	2	2	0	9	15	9	1	3	8	1	0	17	20	1	0	0	1	0	0	0	0
2009	Outer reef	O09	7	5	4	1	0	7	15	9	4	3	6	1	0	15	21	1	0	0	1	0	0	0	0
2009	Outer reef	O09	8	2	1	2	0	6	19	11	1	1	9	0	0	13	24	2	0	0	1	0	0	0	0
2009	Outer reef	O09	7	2	1	3	0	6	18	15	1	1	9	0	0	12	20	2	0	0	3	0	0	0	0
2009	Outer reef	O09	7	2	1	3	0	6	18	12	1	1	9	0	0	13	23	3	0	0	1	0	0	0	0
2009	Outer reef	O09	10	4	3	1	0	25	13	5	1	1	6	0	0	15	14	1	0	0	1	0	0	0	0
2009	Outer reef	O09	10	4	2	1	0	26	13	5	1	1	7	0	0	12	15	2	0	0	1	0	0	0	0
2009	Outer reef	O09	10	4	3	1	0	23	13	7	1	1	6	0	0	13	15	1	0	0	2	0	0	0	0
2009	Inner reef	I09	1	4	3	1	0	11	4	10	0	0	7	0	0	4	26	24	0	2	1	0	1	0	1
2009	Inner reef	I09	1	4	4	1	0	10	4	8	0	0	8	0	0	4	26	24	0	4	1	0	1	0	0
2009	Inner reef	I09	1	4	3	1	0	11	4	10	0	0	7	0	0	4	26	24	0	2	1	0	1	0	1
2009	Inner reef	I09	1	1	9	1	0	16	3	6	0	0	9	0	0	12	16	19	0	3	2	0	2	0	0
2009	Inner reef	I09	2	2	9	3	0	14	2	6	0	0	9	0	0	10	16	20	0	4	1	0	2	0	0
2009	Inner reef	I09	1	1	13	1	0	16	2	6	0	0	9	0	0	10	16	18	0	4	1	0	2	0	0
2009	Inner reef	I09	3	3	3	5	0	12	4	5	0	0	9	0	0	9	14	21	0	7	4	0	1	0	0
2009	Inner reef	I09	1	2	4	2	0	12	5	3	0	0	9	0	0	10	16	26	0	7	2	0	1	0	0
2009	Inner reef	I09	1	5	3	4	0	13	3	3	0	0	8	0	0	8	16	27	0	5	3	0	1	0	0
2009	Inner reef	I09	1	1	4	3	0	11	2	4	0	0	11	0	0	9	13	36	0	3	1	0	1	0	0
2009	Inner reef	I09	1	1	4	1	0	10	3	4	0	0	10	0	0	7	15	38	0	4	1	0	1	0	0
2009	Inner reef	I09	1	1	6	1	0	12	2	5	0	0	10	0	0	8	13	35	0	3	1	0	2	0	0
2009	Outer reef	O09	12	2	0	0	0	6	8	13	4	3	7	0	0	11	23	2	0	3	5	0	0	0	1
2009	Outer reef	O09	11	2	0	0	0	6	8	14	2	3	8	0	0	13	20	2	0	5	5	0	0	0	1
2009	Outer reef	O09	11	2	0	0	0	5	9	14	2	3	7	0	0	12	22	2	0	4	6	0	0	0	1
2009	Outer reef	O09	8	4	0	1	0	6	10	13	4	3	5	0	0	15	24	2	0	3	2	0	0	0	0
2009	Outer reef	O09	8	4	0	1	0	5	10	15	2	3	8	0	0	13	23	3	0	2	2	0	0	0	1
2009	Outer reef	O09	8	4	0	2	0	6	8	13	2	3	6	0	0	14	25	3	0	3	2	0	0	0	1
2009	Outer reef	O09	11	5	0	1	0	2	13	18	1	1	12	0	0	10	19	2	0	2	3	0	0	0	0
2009	Outer reef	O09	11	4	0	2	0	2	13	19	1	1	10	0	0	10	18	2	0	2	4	0	0	0	1
2009	Outer reef	O09	11	4	0	1	0	2	11	17	1	1	8	0	0	12	21	2	0	2	6	0	0	0	1
2009	Outer reef	O09	12	5	1	0	0	4	13	12	1	1	12	0	0	15	15	2	0	3	4	0	0	0	0
2009	Outer reef	O09	12	5	0	0	0	2	15	13	1	1	10	0	0	14	19	2	0	2	4	0	0	0	0
2009	Outer reef	O09	10	4	0	0	0	2	16	16	1	1	10	0	0	16	16	3	0	2	3	0	0	0	0
2020	Inner reef	I20	1	2	2	17	0	0	3	18	0	2	7	7	0	14	20	7	0	0	0	0	0	0	0
2020	Inner reef	I20	1	2	2	13	0	0	4	25	0	2	7	9	0	11	18	6	0	0	0	0	0	0	0
2020	Inner reef	I20	1	2	2	14	0	0	5	16	0	2	7	8	0	13	23	7	0	0	0	0	0	0	0
2020	Inner reef	I20	2	2	2	6	0	0	7	12	0	3	7	20	0	11	17	6	0	0	4	0	1	0	0
2020	Inner reef	I20	2	2	2	6	0	0	13	20	0	1	11	11	0	7	16	6	0	0	1	0	2	0	0
2020	Inner reef	I20	2	2	2	7	0	0	7	15	0	2	12	13	0	10	20	6	0	0	1	0	1	0	0
2020	Inner reef	I20	5	4	8	4	0	1	6	9	0	1	11	6	0	12	27	6	0	0	0	0	0	0	0
2020	Inner reef	I20	4	4	10	5	0	4	5	10	0	1	10	8	0	11	22	6	0	0	0	0	0	0	0
2020	Inner reef	I20	3	4	11	4	0	1	5	10	0	1	11	8	0	11	24	6	0	1	0	0	0	0	0
2020	Inner reef	I20	2	2	2	4	0	0	3	29	0	1	6	18	0	10	16	7	0	0	0	0	0	0	0
2020	Inner reef	I20	3	2	3	4	0	0	3	23	0	1	7	13	0	7	28	6	0	0	0	0	0	0	0
2020	Inner reef	I20	2	2	2	4	0	0	3	32	0	1	5	14	0	7	21	7	0	0	0	0	0	0	0
2020	Outer reef	O20	9	0	3	1	0	0	19	2	0	1	7	7	0	15	29	7	0	0	0	0	0	0	0
2020	Outer reef	O20	8	0	3	1	0	0	17	4	0	1	5	13	0	19	22	7	0	0	0	0	0	0	0
2020	Outer reef	O20	8	0	3	3	0	0	24	2	0	1	6	6	0	16	25	6	0	0	0	0	0	0	0
2020	Outer reef	O20	11	0	3	1	0	0	25	2	0	1	7	6	0	10	26	7	0	1	0	0	0	0	0
2020	Outer reef	O20	14	0	3	1	0	0	16	2	0	1	7	13	0	11	23	8	0	1	0	0	0	0	0
2020	Outer reef	O20	11	0	2	1	0	0	18	2	0	1	8	6	0	13	28	8	0	2	0	0	0	0	0
2020	Outer reef	O20	9	0	1	1	0	0	17	1	0	1	17	3	0	10	34	6	0	0	0	0	0	0	0
2020	Outer reef	O20	8	0	1	1	0	0	17	1	0	1	8	3	0	13	41	6	0	0	0	0	0	0	0
2020	Outer reef	O20	8	0	2	1	0	0	19	3	0	1	7	3	0	14	36	6	0	0	0	0	0	0	0
2020	Outer reef	O20	13	0	1	2	0	0	29	1	0	3	3	3	0	23	16	6	0	0	0	0	0	0	0
2020	Outer reef	O20	15	0	1	3	0	0	21	2	0	1	3	3	0	26	18	7	0	0	0	0	0	0	0
2020	Outer reef	O20	12	0	1	1	0	0	32	2	0	1	3	4	0	21	17	6	0	0	0	0	0	0	0
2020	Inner reef	I20	2	3	29	12	0	0	1	12	0	3	5	3	0	12	10	7	0	1	0	0	0	0	0
2020	Inner reef	I20	2	4	12	21	0	0	2	11	0	2	5	3	0	14	15	8	0	1	0	0	0	0	0
2020	Inner reef	I20	2	2	15	15	0	0	1	19	0	5	5	3	0	14	11	7	0	1	0	0	0	0	0
2020	Inner reef	I20	3	4	8	19	0	0	4	8	0	2	6	7	0	21	8	8	0	2	0	0	0	0	0
2020	Inner reef	I20	3	3	7	24	0	0	2	7	0	1	5	10	0	19	8	9	0	1	1	0	0	0	0
2020	Inner reef	I20	3	6	7	17	0	0	2	10	0	2	7	10	0	14	13	7	0	1	0	0	1	0	0
2020	Inner reef	I20	4	3	10	25	0	1	1	6	0	1	6	8	0	14	9	11	0	1	0	0	0	0	0
2020	Inner reef	I20	3	4	11	24	0	1	3	6	0	1	5	14	0	9	8	10	0	1	0	0	0	0	0
2020	Inner reef	I20	4	4	10	20	0	2	1	6	0	1	9	8	0	10	11	11	0	2	0	0	0	1	0
2020	Inner reef	I20	1	3	13	8	0	0	1	24	0	1	8	3	0	16	13	8	0	1	0	0	0	0	0
2020	Inner reef	I20	2	2	19	8	0	0	1	26	0	1	5	3	0	10	15	7	0	1	0	0	0	0	0
2020	Inner reef	I20	1	2	18	8	0	0	2	15	0	1	9	3	0	12	20	7	0	2	0	0	0	0	0
2020	Outer reef	O20	13	2	3	2	0	0	12	4	0	1	11	14	0	13	15	7	0	1	1	0	0	0	1
2020	Outer reef	O20	12	1	3	3	0	0	12	5	0	1	9	7	0	17	19	9	0	1	1	0	0	0	0
2020	Outer reef	O20	12	2	3	2	0	0	13	5	0	1	8	9	0	13	21	8	0	1	1	0	0	0	1
2020	Outer reef	O20	9	1	3	1	0	0	12	3	0	1	8	5	0	27	22	6	0	1	1	0	0	0	0
2020	Outer reef	O20	9	1	2	1	0	0	14	3	0	1	7	8	0	27	19	6	0	1	1	0	0	0	0
2020	Outer reef	O20	10	1	2	2	0	0	13	3	0	1	7	8	0	26	18	7	0	1	1	0	0	0	0
2020	Outer reef	O20	14	1	2	3	0	0	13	5	0	1	9	3	0	12	30	6	0	1	0	0	0	0	0
2020	Outer reef	O20	10	2	2	4	0	0	13	7	0	1	6	3	0	15	29	6	0	1	0	0	0	1	0
2020	Outer reef	O20	11	3	2	4	0	0	12	7	0	2	7	3	0	17	25	6	0	1	0	0	0	0	0
2020	Outer reef	O20	12	1	10	2	0	0	10	5	0	1	8	6	0	20	17	6	0	1	1	0	0	0	0
2020	Outer reef	O20	13	1	4	2	0	0	11	3	0	1	10	8	0	21	14	6	0	4	1	0	0	1	0
2020	Outer reef	O20	15	1	4	3	0	0	12	5	0	1	11	6	0	19	15	6	0	1	1	0	0	0	0
2020	Inner reef	I20	2	4	36	5	0	0	1	3	19	4	3	2	0	3	9	7	0	2	0	0	0	0	0
2020	Inner reef	I20	3	3	23	7	0	0	1	3	29	3	4	2	0	3	10	7	0	2	0	0	0	0	0
2020	Inner reef	I20	3	4	34	5	0	0	1	3	20	4	3	2	0	3	9	7	0	2	0	0	0	0	0
2020	Inner reef	I20	4	4	23	10	0	0	1	9	5	2	9	5	0	5	8	10	0	3	0	0	2	0	0
2020	Inner reef	I20	5	4	26	10	0	0	1	9	5	2	6	5	0	4	10	8	0	4	0	0	1	0	0
2020	Inner reef	I20	4	4	23	10	0	0	1	7	5	2	6	9	0	8	7	9	0	3	0	0	2	0	0
2020	Inner reef	I20	2	7	19	18	0	2	1	3	6	2	4	5	0	4	11	11	0	4	0	0	0	1	0
2020	Inner reef	I20	3	7	19	20	0	2	1	3	6	2	5	3	0	4	9	10	0	4	0	0	0	2	0
2020	Inner reef	I20	2	7	24	14	0	1	1	3	10	2	5	3	0	7	9	9	0	2	0	0	0	1	0
2020	Inner reef	I20	2	3	18	6	0	0	2	11	5	4	6	3	0	5	23	9	0	3	0	0	0	0	0
2020	Inner reef	I20	2	3	19	5	0	0	6	6	5	3	8	2	0	8	22	9	0	2	0	0	0	0	0
2020	Inner reef	I20	3	3	27	5	0	0	2	6	5	2	6	2	0	10	16	9	0	4	0	0	0	0	0
2020	Outer reef	O20	22	3	4	0	0	0	8	15	0	0	8	4	0	5	14	13	0	0	3	0	0	0	1
2020	Outer reef	O20	21	2	5	0	0	0	9	15	0	0	6	4	0	5	14	12	0	1	3	0	0	1	2
2020	Outer reef	O20	23	2	6	0	0	0	8	9	0	0	8	6	0	5	14	14	0	0	3	0	0	0	2
2020	Outer reef	O20	17	2	3	0	0	0	11	6	0	0	10	3	0	13	20	12	0	1	1	0	0	0	1
2020	Outer reef	O20	19	2	3	0	0	0	13	7	0	0	6	3	0	10	19	16	0	0	1	0	0	0	1
2020	Outer reef	O20	20	2	2	0	0	0	12	7	0	0	9	3	0	12	19	12	0	0	1	0	0	0	1
2020	Outer reef	O20	11	5	5	0	0	0	9	9	0	1	11	5	0	8	21	9	0	1	4	0	0	0	1
2020	Outer reef	O20	13	3	4	0	0	0	8	7	0	1	9	10	0	5	23	9	0	1	6	0	0	0	1
2020	Outer reef	O20	11	4	6	0	0	0	9	9	0	1	9	6	0	5	24	9	0	1	5	0	0	0	1
2020	Outer reef	O20	17	3	3	2	0	0	7	6	0	1	8	8	0	14	19	10	0	0	1	0	0	0	1
2020	Outer reef	O20	18	2	2	2	0	0	8	9	0	1	7	6	0	11	22	10	0	0	1	0	0	0	1
2020	Outer reef	O20	15	3	2	2	0	0	7	7	0	1	7	9	0	14	21	10	0	0	1	0	0	0	1
